# Supplementary material for: SnRNA sequencing defines signaling by RBC-derived extracellular vesicles in the murine heart
Source: Life Sci Alliance. 2021 Oct 18;4(12):e202101048. doi: 10.26508/lsa.202101048 (PMC8548207; doi:10.26508/lsa.202101048)
Supplement: Supplementary file 5 [file LSA-2021-01048_TableS5.xlsx]

## Sheet: Table S5
Table S5: Summary of RBC-EVs miRNA read counts assigned from sequencing
miRNA ID	SVT #1	SVT #2	SVT# 3	SVT# 4	SVT# 5	MI# 1	MI# 2	MI# 3	MI# 4	MI# 5
hsa-let-7f-5p	989	412	40475.5	10	4	7	59	2	245	922
hsa-let-7b-5p	1052	561	26593.5	258	1	26	23	4	155	685
hsa-let-7a-5p	1080	243.5	36666	4	7	54.5	2	56	5	547.5
hsa-miR-451a	7385	4041	279818	251	155	111	118	33	151	505
hsa-miR-486-5p	1418	1458	34222	1	2	22	19	6	4	323
hsa-miR-21-5p	376	130	23422	3	4	60	18	3	5	240
hsa-miR-223-3p	1017	314	40152	5	9	88	23	6	4	237
hsa-miR-92a-3p	1430	263	33764.5	37	4	31	28	4	4	173
hsa-miR-30b-5p	27	0	2851	0	0	0	0	0	0	151
hsa-miR-98-5p	157	0	1181	1	0	0	0	0	1	137
hsa-miR-4433b-5p	55	0	1847	0	0	0	0	0	1	136
hsa-miR-197-3p	0	0	411	0	0	0	0	0	0	133
hsa-miR-423-5p	62	53	1095	0	0	0	0	0	0	70
hsa-miR-339-5p	0	20	2174	1	0	0	0	0	0	35
hsa-miR-374a-5p	0	0	47	0	0	0	0	0	0	34
hsa-miR-146a-5p	68	0	2382	0	0	19	0	0	0	34
hsa-let-7d-5p	12	0	1387	2	0	0.5	0	0	0	32.5
hsa-miR-26b-5p	32	0	2132	0	0	6	7	0	0	31
hsa-miR-26a-5p	584	166	14982	2	5	58	8	2	0	16
hsa-miR-103a-3p	84	2	1952	1	226	0	0	1	1	15
hsa-miR-30c-5p	164	3	10229.5	2	0	2	3	0	44	13
hsa-miR-30d-5p	630	147	11368	5	3	2	2	1	59	3
hsa-let-7c-5p	5	0.5	448.5	0	0	0	0	0	0	2
hsa-miR-30e-5p	327	27	6439	1	1	1	0	0	0	2
hsa-miR-16-2-3p	20	82	2712	1	0	0	0	0	0	1
hsa-miR-484	20	0	3687	1	1	0	1	0	1	1
hsa-miR-142-5p	0	0	57	0	0	0	0	0	0	1
hsa-miR-182-5p	0	0	516	0	0	0	0	0	0	1
hsa-miR-101-3p	1	0	2398	0	0	0	0	1	0	1
hsa-miR-320a	0	0	865	0	0	0	0	0	1	1
hsa-miR-130b-5p	0	0	460	0	0	0	0	0	0	1
hsa-miR-29a-3p	0	0	533	0	0	0	0	0	0	1
hsa-miR-877-5p	0	0	76	0	0	0	0	0	0	1
hsa-miR-186-5p	0	1	1532	0	1	0	1	0	0	1
hsa-miR-191-5p	78	0	4026	0	0	0	0	0	0	1
hsa-let-7i-5p	286	159	6629.5	3	1	0	0	0	2	0
hsa-miR-25-3p	262	66	3970.5	1	1	1	0	2	0	0
hsa-let-7g-5p	221	34	4356.5	0	0	1	1	0	1	0
hsa-let-7d-3p	183	0	2158	1	0	0	0	0	0	0
hsa-miR-142-3p	168	0	3890	1	0	2	0	0	1	0
hsa-miR-24-3p	152	2	1320	0	1	0	0	0	0	0
hsa-miR-15b-5p	147	0	2953	0	0	0	0	0	0	0
hsa-miR-125a-5p	132	0	918	0	0	0	0	0	0	0
hsa-miR-144-3p	121	26	1360	0	0	0	0	0	0	0
hsa-let-7f-1-3p	99	0	31	0	0	0	0	0	0	0
hsa-miR-126-3p	96	25	1616	0	0	0	0	0	0	0
hsa-miR-144-5p	95	0	596	0	0	0	0	0	0	0
hsa-miR-143-3p	91	100	4368	0	0	1	0	1	1	0
hsa-miR-1301-3p	90	0	82	0	0	0	0	0	0	0
hsa-miR-16-5p	86	61	3565	0	1	23	0	0	0	0
hsa-miR-192-5p	83	0	160.5	0	0	0	0	0	0	0
hsa-miR-450a-5p	74	0	9	0	0	0	0	0	0	0
hsa-miR-181a-5p	73	0	685	0	0	0	0	0	0	0
hsa-miR-150-5p	68	0	264	0	0	0	0	0	0	0
hsa-miR-335-3p	66	8	1201	0	0	0	0	0	0	0
hsa-miR-326	58	0	243	0	0	0	0	0	0	0
hsa-miR-7-1-3p	55	0	54	0	0	0	0	0	0	0
hsa-miR-425-5p	53	1	1043	1	0	0	0	0	0	0
hsa-miR-107	52	0	280	0	226	0	0	0	0	0
hsa-miR-126-5p	52	2	2260	1	0	0	1	0	0	0
hsa-miR-93-5p	49	0	1399	0	0	0	0	0	1	0
hsa-miR-222-3p	44	0	1305	0	0	0	0	0	0	0
hsa-miR-342-3p	38	0	672	0	0	0	0	0	0	0
hsa-miR-10a-5p	30	0	521	0	0	0	0	0	0	0
hsa-miR-10b-5p	30	0	559	0	0	0	0	0	0	0
hsa-miR-23b-3p	26.5	0	840.5	0	0	1	0	0	0	0
hsa-miR-20a-5p	26	0	350	0	0	0	0	0	0	0
hsa-miR-23a-3p	24.5	26	3915.5	0	0	0	0	0	0	0
hsa-miR-629-5p	23	0	50	0	0	0	0	0	0	0
hsa-miR-122-5p	23	87	731	0	0	0	0	0	0	0
hsa-miR-181c-5p	17	0	0	0	0	0	0	0	0	0
hsa-miR-27b-3p	17	0	403	0	0	0	0	0	0	0
hsa-miR-28-3p	17	0	380	0	0	0	0	0	0	0
hsa-miR-485-3p	16	0	573	0	0	0	0	0	0	0
hsa-miR-423-3p	13	0	1674	0	0	0	0	1	0	0
hsa-miR-15b-3p	12	1	1610	0	0	0	0	0	0	0
hsa-miR-199a-3p	10	0	0	0	0	0	0	0	0	0
hsa-miR-199b-3p	10	0	0	0	0	0	0	0	0	0
hsa-miR-30a-5p	1	0	278	0	0	0	0	0	1	0
hsa-miR-655-3p	1	0	91	0	0	0	0	0	0	0
hsa-let-7a-3p	1	0	728	0	0	0	0	0	1	0
hsa-miR-99b-5p	1	0	340	0	0	0	0	0	0	0
hsa-miR-339-3p	0	74	22	0	0	0	0	0	0	0
hsa-miR-4685-3p	0	53	49	0	0	0	0	0	0	0
hsa-miR-6741-3p	0	33	13	0	0	0	0	0	0	0
hsa-miR-221-3p	0	31	2067	0	0	0	1	1	1	0
hsa-miR-148b-3p	0	1	740	0	0	0	0	0	0	0
hsa-miR-598-3p	0	1	84	0	0	0	0	0	0	0
hsa-miR-505-3p	0	1	573	0	0	0	0	0	1	0
hsa-miR-199a-3p|hsa-miR-199b-3p	0	1	2547	1	0	19	1	0	0	0
hsa-miR-185-5p	0	1	854	0	0	0	0	0	0	0
hsa-miR-151a-5p|hsa-miR-151b	0	0	1285	0	0	0	0	0	0	0
hsa-miR-148a-3p	0	0	1079	1	0	0	10	0	0	0
hsa-miR-128-3p	0	0	1015	0	0	0	0	1	0	0
hsa-miR-328-3p	0	0	810	1	0	0	0	0	0	0
hsa-miR-15a-5p	0	0	793	0	0	0	0	0	0	0
hsa-miR-27a-3p	0	0	743	1	1	1	5	0	0	0
hsa-miR-19b-3p	0	0	726	0	0	0	0	0	0	0
hsa-miR-584-5p	0	0	696	0	0	0	0	0	0	0
hsa-miR-140-3p	0	0	678	0	0	0	0	0	0	0
hsa-miR-337-3p	0	0	636	0	0	0	0	0	0	0
hsa-let-7e-5p	0	0	600	0	0	0	0	0	0	0
hsa-miR-22-3p	0	0	584	0	0	0	0	0	1	0
hsa-miR-942-5p	0	0	535	0	0	0	0	0	0	0
hsa-miR-654-3p	0	0	455	0	0	0	0	0	0	0
hsa-miR-199a-5p	0	0	435	0	0	0	0	0	0	0
hsa-miR-125b-5p	0	0	417	0	1	0	0	0	0	0
hsa-miR-4286	0	0	393	0	0	0	0	0	0	0
hsa-miR-3615	0	0	392	0	0	0	0	0	0	0
hsa-miR-331-3p	0	0	385	0	0	0	0	0	0	0
hsa-miR-374b-5p	0	0	355	0	0	0	0	0	0	0
hsa-miR-4433b-3p	0	0	351	0	0	10	0	0	0	0
hsa-miR-146b-5p	0	0	348	0	0	0	0	0	0	0
hsa-miR-652-3p	0	0	342	0	0	0	0	0	0	0
hsa-miR-487b-3p	0	0	336	0	0	0	0	0	0	0
hsa-miR-106b-3p	0	0	323	0	0	0	0	0	0	0
hsa-miR-183-5p	0	0	320	0	0	0	0	0	1	0
hsa-miR-133a-3p	0	0	314.5	0	0	0	0	0	0	0
hsa-miR-329-3p	0	0	295	0	0	0	0	0	0	0
hsa-miR-495-3p	0	0	294	0	0	0	0	0	0	0
hsa-miR-493-5p	0	0	293	0	0	0	0	0	0	0
hsa-miR-1-3p	0	0	259	0	0	0	0	0	0	0
hsa-miR-361-5p	0	0	259	0	0	0	0	0	0	0
hsa-miR-139-5p	0	0	255	0	0	0	0	0	0	0
hsa-miR-106b-5p	0	0	240	0	0	0	0	0	0	0
hsa-miR-99a-5p	0	0	237.5	0	0	0	0	0	0	0
hsa-miR-369-3p	0	0	236	0	0	0	0	0	0	0
hsa-miR-340-3p	0	0	226	0	0	0	0	0	0	0
hsa-miR-361-3p	0	0	212	0	0	0	0	1	0	0
hsa-miR-145-5p	0	0	212	0	0	0	0	0	0	0
hsa-miR-409-3p	0	0	212	0	0	0	0	0	0	0
hsa-miR-151a-5p	0	0	211	0	0	0	0	0	0	0
hsa-miR-151a-3p	0	0	199	0	0	0	0	0	0	0
hsa-miR-127-3p	0	0	193	0	0	0	0	0	0	0
hsa-miR-576-5p	0	0	193	0	0	0	0	0	0	0
hsa-miR-382-5p	0	0	192	0	0	0	0	29	0	0
hsa-miR-17-5p	0	0	182	0	0	0	0	0	0	0
hsa-miR-543	0	0	173	0	0	0	0	0	0	0
hsa-miR-340-5p	0	0	172	0	0	0	0	0	0	0
hsa-miR-363-3p	0	0	162	0	0	0	0	0	0	0
hsa-miR-574-5p	0	0	159	1	0	0	0	0	0	0
hsa-miR-486-3p	0	0	152	0	0	0	0	0	0	0
hsa-miR-224-5p	0	0	152	0	0	0	0	0	0	0
hsa-miR-7-5p	0	0	145	0	0	0	0	0	0	0
hsa-miR-376c-3p	0	0	143	0	0	0	0	0	0	0
hsa-miR-1249-3p	0	0	141	0	0	0	0	0	0	0
hsa-miR-32-5p	0	0	121	0	0	1	0	0	0	0
hsa-miR-411-3p	0	0	119	0	0	0	0	0	0	0
hsa-miR-33a-5p	0	0	112	0	0	0	0	0	0	0
hsa-miR-369-5p	0	0	112	0	0	0	0	0	0	0
hsa-miR-26b-3p	0	0	111	0	0	0	0	0	0	0
hsa-miR-140-5p	0	0	110	0	0	0	0	0	0	0
hsa-miR-93-3p	0	0	110	0	0	0	0	0	0	0
hsa-miR-6803-3p	0	0	109	0	0	0	0	0	0	0
hsa-miR-744-5p	0	0	108	0	0	0	0	0	0	0
hsa-miR-299-5p	0	0	100	0	0	0	0	0	0	0
hsa-miR-323a-3p	0	0	98	0	0	0	0	0	0	0
hsa-miR-501-3p	0	0	98	0	0	0	0	0	0	0
hsa-miR-2355-3p	0	0	93	0	0	0	0	0	0	0
hsa-miR-1271-5p	0	0	91	0	0	0	0	0	0	0
hsa-miR-1307-3p	0	0	90	0	0	0	0	0	0	0
hsa-miR-4742-3p	0	0	86	0	0	0	0	0	1	0
hsa-miR-660-5p	0	0	83	0	0	0	0	0	0	0
hsa-miR-664a-3p	0	0	83	0	0	0	0	0	0	0
hsa-miR-181d-5p	0	0	82	0	0	0	0	0	0	0
hsa-miR-1306-5p	0	0	82	0	0	5	0	0	0	0
hsa-miR-431-5p	0	0	80	0	0	0	0	0	0	0
hsa-miR-29c-3p	0	0	78	0	0	0	0	0	0	0
hsa-miR-29c-5p	0	0	78	0	0	0	0	0	0	0
hsa-miR-556-3p	0	0	78	0	0	0	0	0	0	0
hsa-miR-432-5p	0	0	77	0	0	0	0	0	0	0
hsa-miR-379-5p	0	0	76	0	0	0	0	0	0	0
hsa-miR-204-5p	0	0	75	0	0	0	0	0	0	0
hsa-miR-205-5p	0	0	74	0	0	0	0	0	0	0
hsa-miR-92b-3p	0	0	74	0	0	0	0	0	0	0
hsa-miR-323b-3p	0	0	73	0	0	1	0	0	0	0
hsa-miR-494-3p	0	0	73	0	0	0	0	0	0	0
hsa-let-7e-3p	0	0	73	0	0	0	0	0	0	0
hsa-miR-202-5p	0	0	71	0	0	0	0	0	0	0
hsa-miR-574-3p	0	0	70	0	0	0	0	0	0	0
hsa-miR-18a-5p	0	0	69	0	0	0	0	0	0	0
hsa-miR-29b-3p	0	0	68	0	0	1	0	0	0	0
hsa-miR-196b-5p	0	0	67.5	0	0	0	0	0	0	0
hsa-miR-30e-3p	0	0	67	0	0	0	0	0	0	0
hsa-miR-100-5p	0	0	66.5	0	0	0	0	0	0	0
hsa-miR-628-3p	0	0	65	0	0	0	1	0	0	0
hsa-miR-450b-5p	0	0	61	0	0	0	0	0	0	0
hsa-miR-454-5p	0	0	59	0	0	0	0	0	0	0
hsa-miR-425-3p	0	0	58	0	0	0	0	0	0	0
hsa-miR-210-3p	0	0	58	0	0	0	0	0	0	0
hsa-miR-18a-3p	0	0	56	0	0	0	0	0	0	0
hsa-miR-345-5p	0	0	54	0	0	0	0	0	0	0
hsa-miR-132-3p	0	0	54	0	0	0	0	0	0	0
hsa-miR-1285-5p	0	0	53	0	0	0	0	0	0	0
hsa-miR-454-3p	0	0	52	0	0	0	0	0	0	0
hsa-miR-889-3p	0	0	51	0	0	0	0	0	0	0
hsa-miR-1270	0	0	51	0	0	0	0	0	0	0
hsa-miR-154-5p	0	0	49	0	0	0	0	0	0	0
hsa-miR-939-5p	0	0	48	0	0	0	0	0	0	0
hsa-miR-324-3p	0	0	47	0	0	0	0	0	0	0
hsa-miR-106a-5p	0	0	45	0	0	0	0	0	0	0
hsa-miR-502-3p	0	0	44.5	0	0	0	0	0	0	0
hsa-miR-223-5p	0	0	44	0	0	0	0	0	0	0
hsa-miR-651-5p	0	0	43	0	0	0	0	0	0	0
hsa-miR-4326	0	0	42	0	0	0	0	0	0	0
hsa-miR-219a-1-3p	0	0	41	0	0	0	0	0	0	0
hsa-miR-376a-3p	0	0	41	0	0	0	0	0	0	0
hsa-miR-664b-3p	0	0	41	0	0	0	0	0	0	0
hsa-miR-191-3p	0	0	41	0	0	0	0	0	0	0
hsa-miR-155-5p	0	0	40	0	0	0	0	0	0	0
hsa-miR-3173-5p	0	0	40	0	0	0	0	0	0	0
hsa-miR-671-3p	0	0	39	0	0	0	0	0	0	0
hsa-miR-154-3p	0	0	38	0	0	0	0	0	0	0
hsa-miR-769-5p	0	0	38	0	0	0	0	0	0	0
hsa-miR-301a-5p	0	0	38	0	0	0	0	0	0	0
hsa-miR-380-3p	0	0	38	0	0	0	0	0	0	0
hsa-miR-221-5p	0	0	38	0	0	0	0	0	0	0
hsa-miR-6777-3p	0	0	36	0	0	0	0	0	0	0
hsa-miR-374a-3p	0	0	36	0	0	0	0	0	0	0
hsa-miR-3913-5p	0	0	36	0	0	0	0	0	0	0
hsa-miR-338-5p	0	0	35	0	0	0	0	0	0	0
hsa-miR-203a-3p	0	0	34	0	0	0	0	0	0	0
hsa-miR-7977	0	0	34	0	0	0	0	0	0	0
hsa-miR-34a-5p	0	0	34	0	0	0	0	0	0	0
hsa-miR-1307-5p	0	0	33	0	0	0	0	0	0	0
hsa-miR-1284	0	0	33	0	0	0	0	0	0	0
hsa-miR-6791-3p	0	0	33	0	0	0	0	0	0	0
hsa-miR-1273h-3p	0	0	32	0	0	0	0	0	0	0
hsa-miR-3127-3p	0	0	32	0	0	0	0	0	0	0
hsa-miR-548ap-5p|hsa-miR-548j-5p	0	0	32	0	0	0	0	0	0	0
hsa-miR-22-5p	0	0	31	0	0	0	0	0	0	0
hsa-miR-382-3p	0	0	31	0	0	0	0	0	0	0
hsa-miR-625-3p	0	0	31	0	0	0	0	0	0	0
hsa-miR-550a-3p	0	0	31	0	0	0	0	0	0	0
hsa-miR-496	0	0	31	0	0	0	0	0	0	0
hsa-miR-338-3p	0	0	30	0	0	0	0	0	0	0
hsa-miR-421	0	0	30	0	0	0	0	0	0	0
hsa-miR-106a-3p	0	0	30	0	0	0	0	0	0	0
hsa-miR-136-3p	0	0	29	0	0	0	0	0	0	0
hsa-miR-181a-3p	0	0	28	0	0	0	0	0	0	0
hsa-miR-33b-5p	0	0	27	0	0	0	0	0	0	0
hsa-miR-335-5p	0	0	27	0	0	0	0	0	0	0
hsa-miR-185-3p	0	0	27	0	0	0	0	0	0	0
hsa-miR-3200-3p	0	0	26	0	0	0	0	0	0	0
hsa-miR-28-5p	0	0	26	0	0	0	0	0	0	0
hsa-miR-483-5p	0	0	26	0	0	0	0	0	0	0
hsa-miR-532-5p	0	0	25	0	0	0	0	0	0	0
hsa-miR-98-3p	0	0	25	0	0	0	0	0	0	0
hsa-miR-766-3p	0	0	24	0	0	0	0	0	0	0
hsa-miR-5006-3p	0	0	24	0	0	0	0	0	0	0
hsa-miR-3620-5p	0	0	24	0	0	0	0	0	0	0
hsa-miR-96-5p	0	0	23	0	0	0	0	0	0	0
hsa-miR-181a-2-3p	0	0	23	0	0	0	0	0	0	0
hsa-miR-6833-3p	0	0	23	0	0	0	0	0	0	0
hsa-miR-1246	0	0	23	0	0	0	0	0	0	0
hsa-miR-1260b	0	0	23	0	0	0	0	0	0	0
hsa-miR-330-5p	0	0	22	0	0	0	0	0	0	0
hsa-miR-656-3p	0	0	22	0	0	0	0	0	0	0
hsa-miR-151b	0	0	21	0	0	0	0	0	0	0
hsa-miR-4732-3p	0	0	20	0	0	0	0	0	0	0
hsa-miR-3140-3p	0	0	19	0	0	0	0	0	0	0
hsa-let-7f-2-3p	0	0	19	0	0	0	0	0	0	0
hsa-miR-145-3p	0	0	19	0	0	0	0	0	0	0
hsa-let-7e	0	0	17	0	0	0	0	0	0	0
hsa-miR-320b	0	0	17	0	0	0	0	0	0	0
hsa-miR-375	0	0	17	0	0	0	0	0	0	0
hsa-miR-3605-3p	0	0	17	0	0	0	0	0	0	0
hsa-miR-6734-5p	0	0	16	0	0	0	0	0	0	0
hsa-miR-92b-5p	0	0	16	0	0	0	0	0	0	0
hsa-miR-24-1-5p	0	0	16	0	0	0	0	0	0	0
hsa-miR-133b	0	0	15.5	0	0	0	0	0	0	0
hsa-miR-32-3p	0	0	15	0	0	0	0	0	0	0
hsa-miR-6755-3p	0	0	15	0	0	0	0	0	0	0
hsa-miR-877-3p	0	0	14	0	0	0	0	0	0	0
hsa-miR-485-5p	0	0	14	0	0	0	0	0	0	0
hsa-miR-130a-3p	0	0	14	0	0	0	0	0	0	0
hsa-miR-6738-3p	0	0	13	0	0	0	0	0	0	0
hsa-miR-4436b-3p	0	0	13	0	0	0	0	0	0	0
hsa-miR-758-3p	0	0	12	0	0	0	0	0	0	0
hsa-miR-1229-3p	0	0	12	0	0	0	0	0	0	0
hsa-miR-374c-5p	0	0	12	0	0	0	0	0	0	0
hsa-miR-500a-3p	0	0	11.5	0	0	0	0	0	0	0
hsa-miR-556-5p	0	0	11	0	0	0	0	0	0	0
hsa-miR-26a-2-3p	0	0	11	0	0	0	0	0	0	0
hsa-miR-6842-3p	0	0	11	0	0	0	0	0	0	0
hsa-miR-19a-3p	0	0	10	0	0	0	0	0	0	0
hsa-miR-1908-5p	0	0	10	0	0	0	0	0	0	0
hsa-miR-1180-3p	0	0	10	0	0	0	0	0	0	0
hsa-miR-6797-3p	0	0	10	0	0	0	0	0	0	0
hsa-miR-499a-5p	0	0	10	0	0	0	0	0	0	0
hsa-miR-194-5p	0	0	10	0	0	0	0	0	0	0
hsa-miR-148a-5p	0	0	10	0	0	0	0	0	0	0
hsa-miR-4446-3p	0	0	10	0	0	0	0	0	0	0
hsa-miR-539-5p	0	0	10	0	0	0	0	0	0	0
hsa-miR-550a-3-5p|hsa-miR-550a-5p	0	0	10	0	0	0	0	0	0	0
hsa-miR-3613-3p	0	0	9	0	0	0	0	0	0	0
hsa-miR-668-3p	0	0	9	0	0	0	0	0	0	0
hsa-miR-532-3p	0	0	9	0	0	0	0	0	0	0
hsa-miR-500a-5p	0	0	8	0	0	0	0	0	0	0
hsa-miR-491-5p	0	0	8	0	0	0	0	0	0	0
hsa-miR-1296-5p	0	0	8	0	0	0	0	0	0	0
hsa-miR-9-5p	0	0	7	0	0	0	0	0	0	0
hsa-miR-370-3p	0	0	7	0	0	0	0	0	0	0
hsa-miR-1299	0	0	7	0	0	0	0	0	0	0
hsa-miR-26a-1-3p	0	0	6	0	0	0	0	0	0	0
hsa-miR-99b-3p	0	0	6	0	0	0	0	0	0	0
hsa-miR-181b-5p	0	0	6	0	0	0	0	0	0	0
hsa-miR-362-3p	0	0	6	0	0	0	0	0	0	0
hsa-miR-124-3p	0	0	6	0	0	0	0	0	0	0
hsa-miR-548aq-5p	0	0	6	0	0	0	0	0	0	0
hsa-miR-5583-3p	0	0	5	0	0	0	0	0	0	0
hsa-miR-548j-5p	0	0	5	0	0	0	0	0	0	0
hsa-miR-2110	0	0	5	0	0	0	0	0	0	0
hsa-miR-483-3p	0	0	5	0	0	0	0	0	0	0
hsa-miR-1275	0	0	4	0	0	0	0	0	0	0
hsa-miR-365a-3p|hsa-miR-365b-3p	0	0	4	0	0	0	0	0	0	0
hsa-miR-134-5p	0	0	4	0	0	0	0	0	0	0
hsa-miR-671-5p	0	0	3	0	0	0	0	0	0	0
hsa-miR-10a-3p	0	0	3	0	0	0	0	0	0	0
hsa-miR-103a-2-5p	0	0	3	0	0	0	0	0	0	0
hsa-miR-493-3p	0	0	1	0	0	0	0	0	0	0
hsa-miR-548as-5p	0	0	1	0	0	0	0	0	0	0
hsa-miR-627-3p	0	0	1	0	0	0	0	0	0	0
hsa-miR-1277-5p	0	0	1	0	0	0	0	0	0	0
hsa-miR-4454	0	0	1	0	0	0	0	0	0	0
hsa-miR-23c	0	0	1	0	0	0	0	0	0	0
hsa-miR-452-5p	0	0	1	0	0	0	0	0	0	0
hsa-miR-1228-3p	0	0	1	0	0	0	0	0	0	0
hsa-let-7c	0	0	1	0	0	0	0	0	0	0
hsa-miR-1277-3p	0	0	1	0	0	0	0	0	0	0
hsa-miR-320d	0	0	1	0	0	0	0	0	0	0
hsa-mir-30c-1	0	0	0.5	0	0	0	0	0	0	0
hsa-let-7a-1	0	0	0.5	0	0	0	0	0	0	0
hsa-miR-215-5p	0	0	0.5	0	0	0	0	0	0	0
hsa-miR-196a-5p	0	0	0.5	0	0	0	0	0	0	0
hsa-miR-17-3p	0	0	0	0	0	0	1	0	0	0
SVT: Supravenricular Tachycardia; MI: Myocardial Infarction;
